# Supplementary material
Source: Springer Nature journal article supplement (https://www.springermedizin.de/resource/supplementary/12879_2012_2154_MOESM2_ESM.pdf/9443816)
Supplement: MOESM2 [file 9443816]

Sensitivity and specificity of SVC vs PCR

**HAdV** SVC vs. PCR (n=427)

|              | PCR Positive | PCR Negative |
|--------------|--------------|--------------|
| SVC Positive | 14           | 2            |
| SVC Negative | 73           | 338          |

Sensitivity: 16.0%  
 Specificity: 99.0%  
 PPV: 87.5%  
 NPV: 82.2%

**FLUAV** SVC vs. PCR (n=427)

|              | PCR Positive | PCR Negative |
|--------------|--------------|--------------|
| SVC Positive | 4            | 0            |
| SVC Negative | 11           | 412          |

Sensitivity: 26.0%  
 Specificity: 100.0%  
 PPV: 100.0%  
 NPV: 97.3%

**FLUBV** SVC vs. PCR (n=427)

|              | PCR Positive | PCR Negative |
|--------------|--------------|--------------|
| SVC Positive | 1            | 0            |
| SVC Negative | 4            | 422          |

Sensitivity: 20.0%  
 Specificity: 100.0%  
 PPV: 100.0%  
 NPV: 99.0%

**HPIV-1** SVC vs. PCR (n=427)

|              | PCR Positive | PCR Negative |
|--------------|--------------|--------------|
| SVC Positive | 17           | 0            |
| SVC Negative | 13           | 397          |

Sensitivity: 56.0%  
 Specificity: 100.0%  
 PPV: 100.0%  
 NPV: 96.8%

**HPIV-2** SVC vs. PCR (n=427)

|              | PCR Positive | PCR Negative |
|--------------|--------------|--------------|
| SVC Positive | 0            | 0            |
| SVC Negative | 14           | 413          |

Sensitivity: 0.0%

Specificity: 100.0%

PPV: NaN

NPV: 96.7%

**HPIV-3** SVC vs. PCR (n=427)

|              | PCR Positive | PCR Negative |
|--------------|--------------|--------------|
| SVC Positive | 16           | 1            |
| SVC Negative | 23           | 387          |

Sensitivity: 41.0%

Specificity: 99.0%

PPV: 94.1%

NPV: 94.3%

**RSV** SVC vs. PCR (n=427)

|              | PCR Positive | PCR Negative |
|--------------|--------------|--------------|
| SVC Positive | 62           | 0            |
| SVC Negative | 40           | 325          |

Sensitivity: 60.0%

Specificity: 100.0%

PPV: 100.0%

NPV: 89.0%
